# Supplementary material for: Variation of through-space magnetic response properties upon the formation of cation–π interactions: a survey of [Ag(η-CH2CH2)3]+via DFT calculations
Source: Royal Society of Chemistry journal article supplement (doi:10.1039/c5nj00475f), 2015-01-01
Supplement: c5nj00475f1.pdf [file c5nj00475f1.pdf]

- Supporting Information -

for

**Variation of trough-space magnetic response properties upon formation of Cation- $\pi$  interactions. A survey of  $[\text{Ag}(\eta\text{-CH}_2\text{CH}_2)_3]^+$  via DFT calculations.**

Content:

- **Table S1.** Calculated  $^1\text{H}$  and  $^{13}\text{C}$  NMR parameters, including the population  $\pi_1$  and  $\pi_2$  orbitals of ethylene, and Ag-C and CC Wiberg bond order.
- **Figure S1.** Position of (3,-1) critical points and selected points in the space.

|                                                                                  | Cent-Ag<br>(Å) | $\delta C^*$<br>(ppm) | $\delta H^*$<br>(ppm) | Pop. $\pi_1$<br>(a.u.) | Pop. $\pi_2$<br>(a.u.) | Ag-C<br>WBO | CC<br>WBO |
|----------------------------------------------------------------------------------|----------------|-----------------------|-----------------------|------------------------|------------------------|-------------|-----------|
| Free<br>CH <sub>2</sub> CH <sub>2</sub>                                          |                | 124.9                 | 6.4                   | 2.00                   | 0.00                   |             | 2.00      |
| [Ag(C <sub>2</sub> H <sub>2</sub> ) <sub>3</sub> ] <sup>+</sup><br>Eq. structure | 2.280          | 114.8                 | 6.0                   | 1.84                   | 0.11                   | 0.34        | 1.79      |
|                                                                                  | 2.400          | 115.3                 | 6.3                   | 1.86                   | 0.08                   | 0.15        | 1.83      |
|                                                                                  | 2.600          | 118.0                 | 6.6                   | 1.88                   | 0.04                   | 0.13        | 1.88      |
|                                                                                  | 2.800          | 124.6                 | 6.8                   | 1.89                   | 0.02                   | 0.11        | 1.91      |
|                                                                                  | 3.000          | 128.2                 | 6.9                   | 1.91                   | 0.01                   | 0.09        | 1.93      |
|                                                                                  | 3.200          | 129.8                 | 6.9                   | 1.91                   | 0.01                   | 0.09        | 1.95      |
|                                                                                  | 3.400          | 130.6                 | 6.9                   | 1.91                   | 0.00                   | 0.08        | 1.95      |
|                                                                                  | 3.600          | 131.2                 | 6.9                   | 1.91                   | 0.00                   | 0.08        | 1.96      |
|                                                                                  | 3.800          | 131.6                 | 6.9                   | 1.92                   | 0.00                   | 0.08        | 1.96      |
|                                                                                  | 4.000          | 131.8                 | 6.9                   | 1.91                   | 0.00                   | 0.08        | 1.96      |
|                                                                                  | 4.200          | 132.2                 | 6.9                   | 1.91                   | 0.00                   | 0.08        | 1.95      |

\*Calculated chemical shift for C and H, which were referenced to TMS, at the QZ4P/GIAO/ZORA/BP86 level.

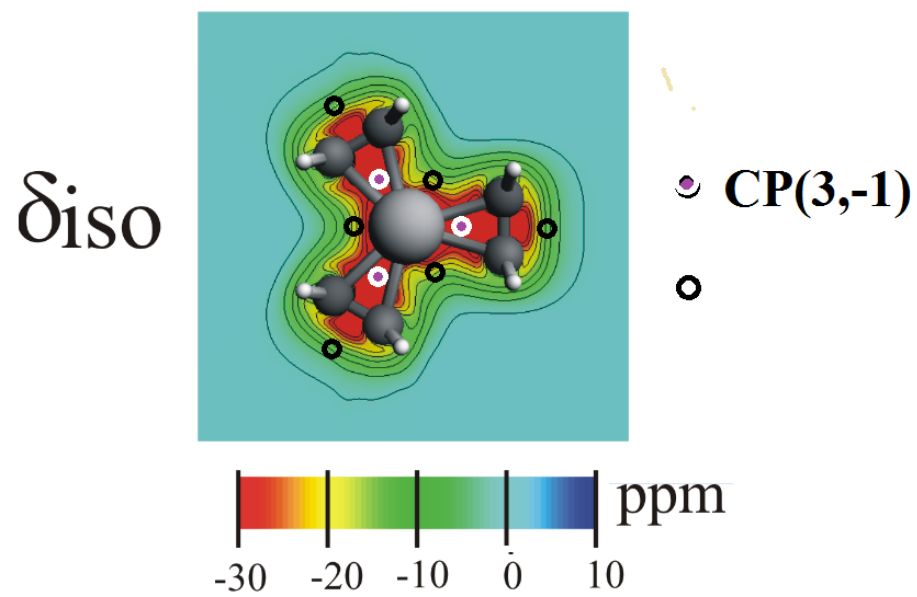

**Figure S1.** Position of (3,-1) critical points and selected points in the space, given for comparison.
